# Supplementary material
Source: publisher figshare collection journal article supplement (https://sage.figshare.com/ndownloader/files/22164300)
Supplement: Supplementary file 1 [file 22164300]

**ECHELLE AHRS – Auditory Hallucination Rating Scale**

*Evaluation des hallucinations des 24 dernières heures:* D’après Hoffman et al., 2003

| **AH1-** Quelle est la fréquence des voix ? | | **AH4-** En moyenne quelle était la longueur du contenu de la voix prédominante ? | |
| --- | --- | --- | --- |
| aucune | 0 | Aucune ou seulement un marmonnement | 0 |
| Rares 1 à 5/ 24H | 1 | Simple mot | 1 |
| Occasionnelles 5 à 10 / 24H | 2 | Bribes de phrases | 2 |
| Occasionnelles 1 à 2 / H | 3 | Phrases complètes | 3 |
| Fréquentes 3-6 / H | 4 | Multiples phrases | 4 |
| Fréquentes 7-10 / H | 5 | Flot continu > 30 secondes | 5 |
| Très fréquentes 11-20 / H | 6 | **AH5-** A quel point les voix modifient-elles ce que vous pensez, ressentez ou faites ? | |
| Très fréquentes 21-50 / H | 7 | Aucune voix | 0 |
| Rapides > 1/Mn | 8 | Elles ne me touchent pas du tout | 1 |
| Quasiment ininterrompues | 9 | Elles me distraient parfois | 2 |
| **AH2-** A quel point le son des voix ressemble-t-il à une voix réelle ? | | Je suis brièvement distrait par la voix lors d’un épisode | 3 |
| Ne se distinguent pas de la pensée du sujet | 0 | Je dois généralement prêter attention aux voix lorsque je les entends | 4 |
| Imaginaires | 1 | Lorsque j’entends une voix elle modifie souvent ce que je fais, dis et pense | 5 |
| Vagues | 2 | Modifient totalement mon comportement | 6 |
| Comme un rêve | 3 | Les voix sont le seul fait important  y fait très attention | 7 |
| Pratiquement réelles | 4 | **AH­6-** A quel point ces voix sont-elles pénibles ? | |
| Très réelles (comme un discours) | 5 | Aucune voix | 0 |
| **AH3-** En moyenne, quel est le volume de la voix prédominante ? | | Pas pénibles, peuvent être agréables | 1 |
| Trop faible pour être entendu clairement | 0 | Faiblement pénibles | 2 |
| Chuchotées mais claires | 1 | Modérément pénibles | 3 |
| Doux | 2 | Parfois provoquent une peur ou une anxiété significative | 4 |
| A voix haute normale | 3 | Souvent provoquent une peur ou une anxiété significative | 5 |
| Forte | 4 | **AH7-** Combien de voix entendez-vous dont vous puissiez distinguer les mots ? | |
| Cris / hurlements | 5 | Indiquer le nombre de voix, si plus de 5 voix différentes, coter 6 |  |
| **Score GLOBAL :** |___|___| | | | |

**Score de modification des hallucinations auditives (à faire en dernier)**0 2 4 6 8 10 12 14 16 18 **20**

Critères de cotation de l’échelle AHRS

La passation doit être effectuée par un cotateur entraîné connaissant parfaitement le glossaire de la forme complète de l'échelle. Dans ce cas, la durée en est de 10 à 15 minutes. L’entretien a pour but d’évaluer le symptôme « hallucinations auditives », dans ses différentes dimensions, au cours des 24 dernières heures.

La cotation sera effectuée à l’issue de l’entretien. L’évaluateur reprendra chacun des items, à partir de la proposition cotant le maximum et cochera celle correspondant le mieux aux informations collectées au cours de l’entretien (moyenne). La passation peut être soit unique (instrument descriptif) soit répétée. Dans ce dernier cas, pour le même malade l'heure de passation dans la journée et le cotateur doivent être identiques.

Le score de modification des hallucinations (« Hallucination Change Scale », HCS) devra être renseigné après avoir coté les items de l’AHRS selon les modalités décrites ci-après. Il s’agit d’un score reflétant l’évolution de la symptomatologie, dans un contexte de mesures répétées. Pour calculer ce score, on attribue une note de 10 au score de base. Lors de la mesure suivante, on attribue un score allant de 0 à 20, avec 0 pour une absence d’hallucinations, et 20 pour des hallucinations deux fois plus sévères par rapport à la mesure de base.

Déroulement pratique de l’entretien

La passation commence par un entretien "libre" d’environ 5 minutes où le patient explique les raisons de sa consultation ou de son hospitalisation et donne des détails sur sa biographie. Le patient décrira ensuite ce qu’il a vécu pendant la période des 24 heures, puis parlera de façon non dirigée de ses voix au cours de cette période. Le cotateur complètera les informations données en demandant au patient d’évoquer ses activités pendant cette période, comment il se sentait, son humeur, ses hauts et ses bas, les interactions avec d’autres personnes, les évènements positifs et négatifs. Ensuite, il posera au patient des questions plus spécifiques concernant l’impact des voix sur le déroulement des 24 dernières heures, sur son état d’esprit, sur son fonctionnement. Ces questions ont pour le but de faire un résumé de l’expérience hallucinatoire des 24 dernières heures. Ces informations devront être reportées sur la partie laissée libre à cet effet au début du questionnaire.

Puis, en ce qui concerne la cotation des items l’évaluateur posera les questions en utilisant l’intitulé des différents items. Pour chacune des réponses, l’évaluateur relèvera précisément les propos du patient. Il est conseillé de laisser le patient formuler le plus librement possible sa réponse .Dans certains cas les questions pourront être adaptées à la compréhension du patient, mais devront correspondre au mieux aux questions constituant l’échelle.

L’évaluateur remplira l’échelle à la fin de l’évaluation selon les modalités décrites plus haut.

A l’issue de la cotation des items de l’AHRS, le cotateur évaluera le score de modification des hallucinations (HCS). Ce dernier devra tenir compte non seulement de la perception propre du patient, mais aussi sur votre propre impression au vu des réponses données pour chacun des items de l’AHRS et des évaluations des semaines précédentes.

N.B. : Notez bien que pour l’item concernant le niveau de détresse lié aux voix, il s’agit du niveau moyen, sur les 24 heures et non en rapport avec une seule voix.
